# Supplementary material for: Anion effects on Li ion transference number and dynamic ion correlations in glyme–Li salt equimolar mixtures
Source: Royal Society of Chemistry journal article supplement (doi:10.1039/d0cp06381a), 2021-01-01
Supplement: d0cp06381a1.pdf [file d0cp06381a1.pdf]

**Supplementary Information (SI)**

**Anion effects on Li ion transference number and  
dynamic ion correlations in glyme-Li salt  
equimolar mixtures**

Keisuke Shigenobu <sup>1</sup>, Masayuki Shibata <sup>2</sup>, Kaoru Dokko <sup>1,3</sup>, Masayoshi Watanabe <sup>3</sup>, Kenta Fujii <sup>2,\*</sup>

and Kazuhide Ueno <sup>1,3\*</sup>

<sup>1</sup> Department of Chemistry and Life Science, Yokohama National University, 79-5 Tokiwadai,  
Hodogaya-ku, Yokohama 240-8501, Japan.

<sup>2</sup> Graduate School of Sciences and Technology for Innovation, Yamaguchi University, 2-16-1  
Tokiwadai, Ube, Yamaguchi 755-8611, Japan

<sup>3</sup> Advanced Chemical Energy Research Centre (ACERC), Institute of Advanced Sciences,  
Yokohama National University, 79-5 Tokiwadai, Hodogaya-ku, Yokohama 240-8501, Japan.

CORRESPONDING AUTHORS: To whom correspondence should be addressed.

Kazuhide Ueno: Telephone/Fax: +81-45-339-3951. E-mail: ueno-kazuhide-rc@ynu.ac.jp

Kenta Fujii: Telephone/Fax: +81-836-85-9212. Email: k-fujii@yamaguchi-u.ac.jp

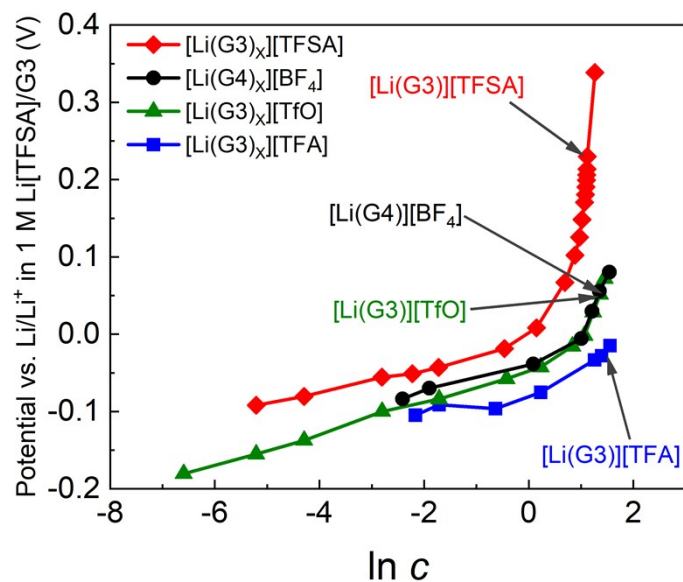

**Figure S1.** Plots of the Li/Li<sup>+</sup> electrode potential against natural logarithm of the Li salt concentration in mixture of LiX in glyme (G3 or G4) at 30 °C. The reference electrode was Li/Li<sup>+</sup> in 1 mol dm<sup>-3</sup> Li[TFSA]/G3. Data for [Li(G3)][TFSA] were obtained from ref. 20.

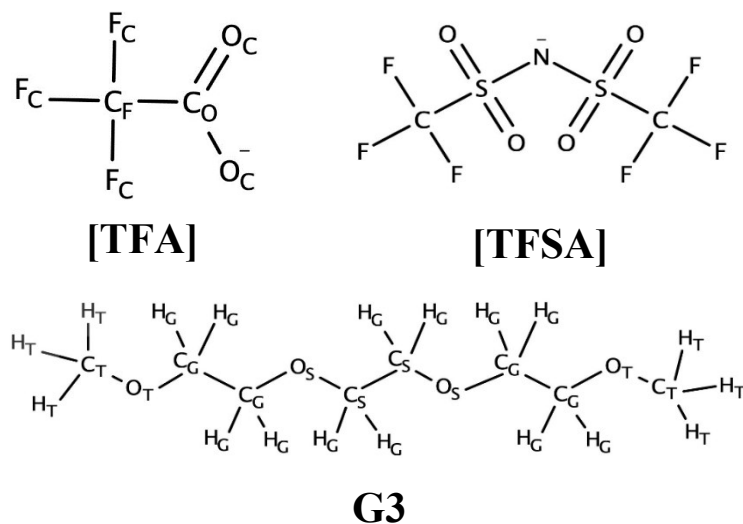

**Figure S2.** Atom types used for MD simulations.

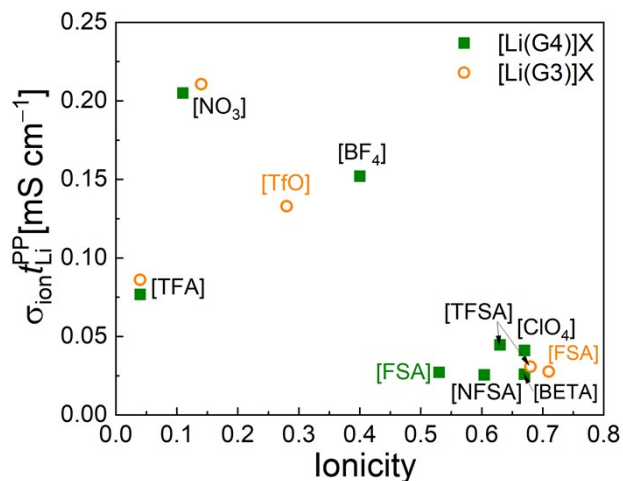

**Figure S3.** Plots of the product of  $t_{Li}^{PP}$  and ionic conductivity ( $\sigma_{ion}$ ) versus ionicity for [Li(glyme)]X.

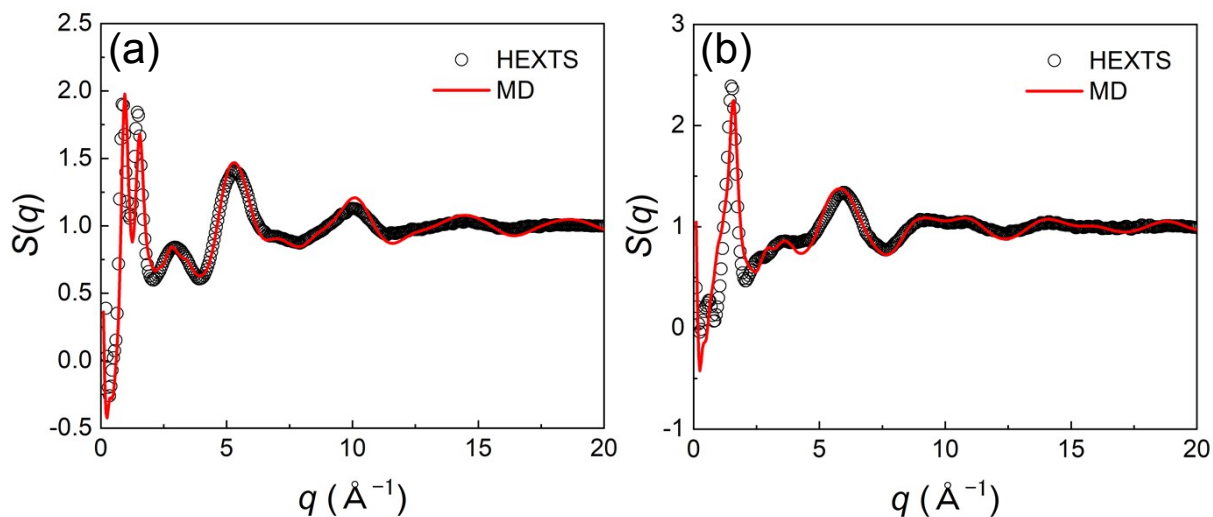

**Figure S4.** Structure factors in the form  $S(q)$  obtained by HEXTS measurements (open circles) and MD simulations (solid red lines) for (a)  $[\text{Li}(\text{G3})][\text{TFSA}]$  and (b)  $[\text{Li}(\text{G3})][\text{TFA}]$ .

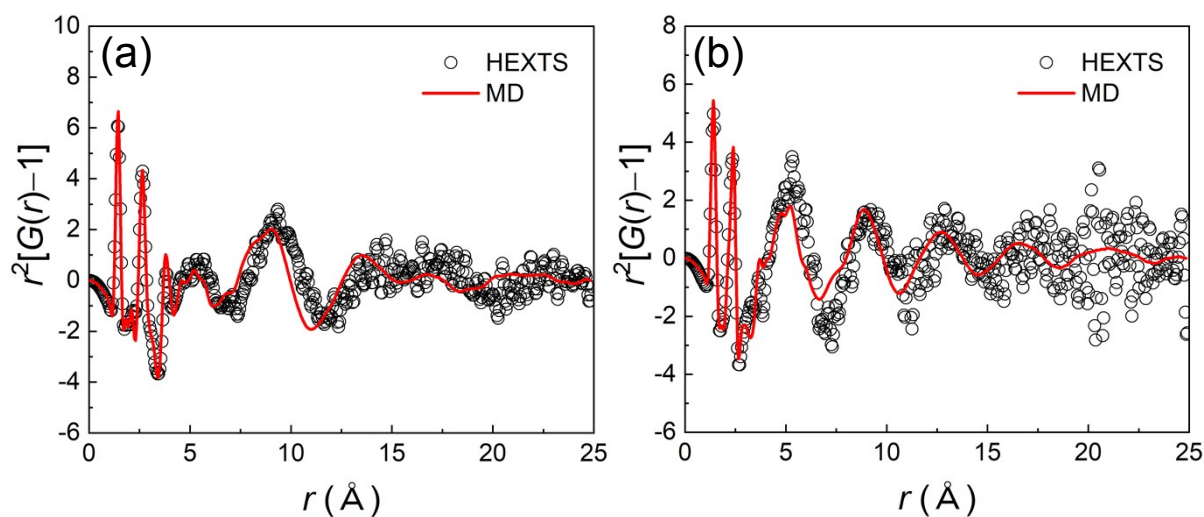

**Figure S5.** X-ray radial distribution functions in the  $r^2[G(r)-1]$  form derived from HEXTS experiments (open circles) and MD simulations (solid red lines) for (a)  $[\text{Li}(\text{G3})][\text{TFSA}]$  and (b)  $[\text{Li}(\text{G3})][\text{TFA}]$ .

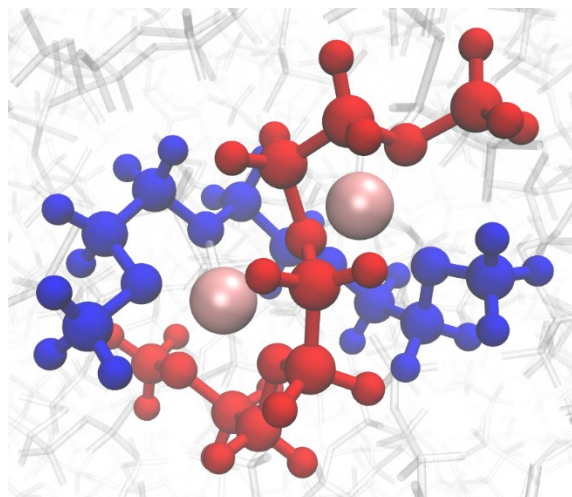

**Figure S6.** Snapshot of the coordination structure of  $[\text{Li}_2(\text{G3})_2]^{2+}$  found in  $[\text{Li}(\text{G3})][\text{TFSA}]$  obtained from MD simulations. Pink:  $\text{Li}^+$  and Blue and Red: G3.

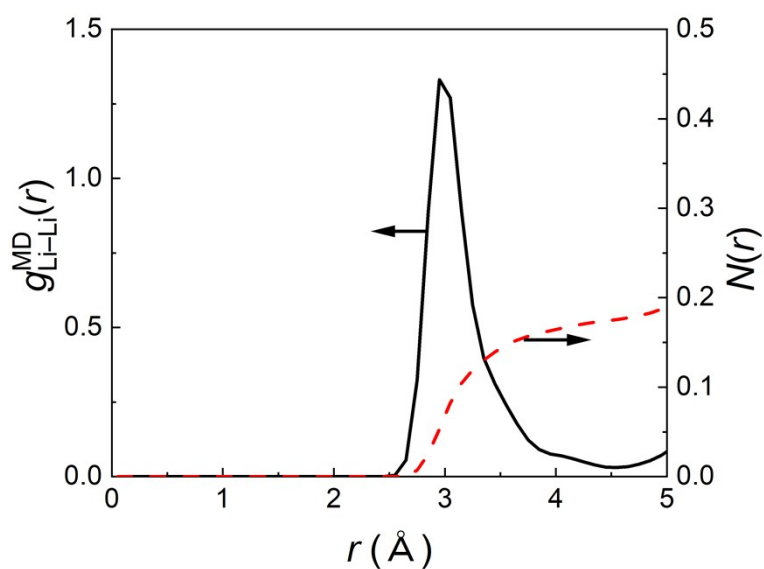

**Figure S7.**  $\text{Li}^+-\text{Li}^+$  pair correlation function  $[g_{\text{Li}-\text{Li}}^{\text{MD}}(r)]$ : left axis and solid black line] and the integrated profile [cumulative coordination number  $N(r)$ : right axis, dashed red line] for  $[\text{Li}(\text{G3})][\text{TFSA}]$ .

## Numerical data

**Table S1.** Densities, compositions (numbers of ion-pairs and solvents) and box lengths of the systems for the MD simulations.

| Sample         | Density [g cm <sup>-3</sup> ] |                   | Li-anion | G3  | Box length [Å] |
|----------------|-------------------------------|-------------------|----------|-----|----------------|
|                | MD <sup>a</sup>               | Exp. <sup>b</sup> |          |     |                |
| [Li(G3)][TFSA] | 1.5157                        | 1.430             | 790      | 790 | 73.9           |
| [Li(G3)][TFA]  | 1.2744                        | 1.2091            | 790      | 790 | 67.6           |

<sup>a</sup> Density values obtained from the MD simulations.

<sup>b</sup> Experimental density values.

**Table S2.** Force field parameters used for molecular dynamics simulations (Atom types is shown in **Figure S2**).

**Partial charges and Lennard-Jones potential parameters:** Partial charges of [TFA]<sup>-</sup> were calculated based on the ChelpG method [MP2/cc-pVTZ(-f)//HF/6-31G(d) levels of theory]. Lennard-Jones potential parameters  $\sigma$  and  $\epsilon$  of C<sub>O</sub> and O<sub>C</sub> atoms were obtained from ref. 33 SI and those of F<sub>C</sub> and C<sub>F</sub> atoms were obtained from ref. 34. All of the parameters regarding [TFSA]<sup>-</sup> and G3 were obtained from ref. 31 and ref. 35, respectively.

|                     | Atom           | Partial charge | Lennard-Jones potential |                                      |
|---------------------|----------------|----------------|-------------------------|--------------------------------------|
|                     |                |                | $\sigma$ [Å]            | $\epsilon$ [kcal mol <sup>-1</sup> ] |
| [TFA] <sup>-</sup>  | C <sub>O</sub> | 0.8033         | 3.75                    | 0.105                                |
|                     | O <sub>C</sub> | -0.7701        | 2.96                    | 0.210                                |
|                     | F <sub>C</sub> | -0.2750        | 2.95                    | 0.053                                |
|                     | C <sub>F</sub> | 0.5619         | 3.5                     | 0.066                                |
| [TFSA] <sup>-</sup> | F              | -0.16          | 2.95                    | 0.053                                |
|                     | C              | 0.35           | 3.5                     | 0.066                                |
|                     | O              | -0.53          | 2.96                    | 0.210                                |
|                     | S              | 1.02           | 3.55                    | 0.250                                |
|                     | N              | -0.66          | 3.25                    | 0.170                                |
| G3                  | H <sub>T</sub> | 0.03           | 2.5                     | 0.030                                |
|                     | H <sub>G</sub> | 0.06           | 2.5                     | 0.030                                |
|                     | C <sub>T</sub> | 0.11           | 3.5                     | 0.066                                |
|                     | C <sub>G</sub> | 0.15           | 3.5                     | 0.066                                |
|                     | C <sub>S</sub> | 0.18           | 3.5                     | 0.066                                |
|                     | O <sub>T</sub> | -0.45          | 2.9                     | 0.140                                |
|                     | O <sub>S</sub> | -0.59          | 2.9                     | 0.14                                 |

**Bond stretching parameters:** The parameters of [TFA]<sup>-</sup> regarding F<sub>C</sub>-C<sub>F</sub> bond stretching were obtained from ref. 34 and those of C<sub>F</sub>-C<sub>O</sub> and O<sub>C</sub>-C<sub>O</sub> bond stretching and G3 were collected from ref. 32. In regard to [TFSA]<sup>-</sup>, we have used the parameters appeared in ref. 31.

|                                | Bond                           | $K_S$ [kcal mol <sup>-1</sup> Å <sup>-2</sup> ] | $r$ [Å] |
|--------------------------------|--------------------------------|-------------------------------------------------|---------|
| [TFA] <sup>-</sup>             | F <sub>C</sub> -C <sub>F</sub> | 367.0                                           | 1.332   |
|                                | C <sub>F</sub> -C <sub>O</sub> | 317.0                                           | 1.522   |
|                                | O <sub>C</sub> -C <sub>O</sub> | 656                                             | 1.25    |
| [TFSA] <sup>-</sup>            | C-F                            | 441.7                                           | 1.323   |
|                                | C-S                            | 232.9                                           | 1.818   |
|                                | S-O                            | 636.8                                           | 1.437   |
|                                | N-S                            | 374.7                                           | 1.57    |
| G3                             | H <sub>T</sub> -C <sub>T</sub> | 340                                             | 1.09    |
|                                | C <sub>T</sub> -O <sub>T</sub> | 320                                             | 1.41    |
|                                | O <sub>T</sub> -C <sub>G</sub> | 320                                             | 1.41    |
|                                | H <sub>G</sub> -C <sub>G</sub> | 340                                             | 1.09    |
|                                | C <sub>G</sub> -C <sub>G</sub> | 310                                             | 1.526   |
|                                | C <sub>G</sub> -O <sub>S</sub> | 320                                             | 1.41    |
|                                | O <sub>S</sub> -C <sub>S</sub> | 320                                             | 1.41    |
|                                | H <sub>G</sub> -C <sub>S</sub> | 340                                             | 1.09    |
| C <sub>S</sub> -C <sub>S</sub> | 310                            | 1.526                                           |         |

**Angle bending parameters:** The parameters of [TFA]<sup>-</sup> regarding F<sub>C</sub>-C<sub>F</sub>-F<sub>C</sub> and F<sub>C</sub>-C<sub>F</sub>-C<sub>O</sub> angle bending were obtained from ref. 34 and those of C<sub>F</sub>-C<sub>O</sub>-O<sub>C</sub> and O<sub>C</sub>-C<sub>O</sub>-O<sub>C</sub> angle bending and G3 were collected from ref. 32. In regard to [TFSA]<sup>-</sup>, we have used the parameters appeared in ref. 31.

|                     | Angle                                          | $K_{\theta}$ [kcal mol <sup>-1</sup> rad <sup>-2</sup> ] | $\theta$ [deg] |
|---------------------|------------------------------------------------|----------------------------------------------------------|----------------|
| [TFA] <sup>-</sup>  | F <sub>C</sub> -C <sub>F</sub> -F <sub>C</sub> | 77.0                                                     | 109.1          |
|                     | F <sub>C</sub> -C <sub>F</sub> -C <sub>O</sub> | 50.0                                                     | 109.5          |
|                     | C <sub>F</sub> -C <sub>O</sub> -O <sub>C</sub> | 70.0                                                     | 117            |
|                     | O <sub>C</sub> -C <sub>O</sub> -O <sub>C</sub> | 80                                                       | 126            |
| [TFSA] <sup>-</sup> | F-C-F                                          | 93.3                                                     | 107.1          |
|                     | S-C-F                                          | 82.9                                                     | 111.7          |
|                     | O-S-O                                          | 115.7                                                    | 118.5          |
|                     | C-S-O                                          | 103.9                                                    | 102.6          |
|                     | O-S-N                                          | 94.2                                                     | 113.6          |
|                     | C-S-N                                          | 91.3                                                     | 103.5          |
|                     | S-N-S                                          | 80.1                                                     | 125.6          |
| G3                  | H <sub>T</sub> -C <sub>T</sub> -H <sub>T</sub> | 35.0                                                     | 109.5          |
|                     | H <sub>T</sub> -C <sub>T</sub> -O <sub>T</sub> | 50.0                                                     | 109.5          |
|                     | C <sub>T</sub> -O <sub>T</sub> -C <sub>G</sub> | 60.0                                                     | 109.5          |
|                     | O <sub>T</sub> -C <sub>G</sub> -H <sub>G</sub> | 50.0                                                     | 109.5          |
|                     | O <sub>T</sub> -C <sub>G</sub> -C <sub>G</sub> | 50.0                                                     | 109.5          |
|                     | H <sub>G</sub> -C <sub>G</sub> -H <sub>G</sub> | 35.0                                                     | 109.5          |
|                     | H <sub>G</sub> -C <sub>G</sub> -C <sub>G</sub> | 50.0                                                     | 109.5          |
|                     | C <sub>G</sub> -C <sub>G</sub> -O <sub>S</sub> | 50.0                                                     | 109.5          |
|                     | H <sub>G</sub> -C <sub>G</sub> -O <sub>S</sub> | 50.0                                                     | 109.5          |
|                     | C <sub>G</sub> -O <sub>S</sub> -C <sub>S</sub> | 60.0                                                     | 109.5          |
|                     | O <sub>S</sub> -C <sub>S</sub> -H <sub>G</sub> | 50.0                                                     | 109.5          |



---

|               |      |       |
|---------------|------|-------|
| $O_S-C_S-C_S$ | 50.0 | 109.5 |
| $H_G-C_S-C_S$ | 50.0 | 109.5 |
| $H_G-C_S-H_G$ | 35.0 | 109.5 |

---

**Torsional parameters:** The parameters of [TFA]<sup>-</sup> and G3 were obtained from ref. 33 SI and those of [TFSA]<sup>-</sup> were collected from ref. 31.

|                                                                | Dihedral                                                       | $V_1$ [kcal mol <sup>-1</sup> ] | $V_2$ [kcal mol <sup>-1</sup> ] | $V_3$ [kcal mol <sup>-1</sup> ] |
|----------------------------------------------------------------|----------------------------------------------------------------|---------------------------------|---------------------------------|---------------------------------|
| [TFA] <sup>-</sup>                                             | F <sub>C</sub> -C <sub>F</sub> -C <sub>O</sub> -O <sub>C</sub> | 0.000                           | 0.000                           | 0.000                           |
| [TFSA] <sup>-</sup>                                            | O-S-C-F                                                        | 0.000                           | 0.000                           | 0.347                           |
|                                                                | N-S-C-F                                                        | 0.000                           | 0.000                           | 0.316                           |
|                                                                | O-S-N-S                                                        | 0.000                           | 0.000                           | -0.004                          |
|                                                                | S-N-S-C                                                        | 7.833                           | -2.489                          | -0.763                          |
| G3                                                             | H <sub>T</sub> -C <sub>T</sub> -O <sub>T</sub> -C <sub>G</sub> | 0.000                           | 0.000                           | 0.760                           |
|                                                                | C <sub>T</sub> -O <sub>T</sub> -C <sub>G</sub> -H <sub>G</sub> | 0.000                           | 0.000                           | 0.760                           |
|                                                                | C <sub>T</sub> -O <sub>T</sub> -C <sub>G</sub> -C <sub>G</sub> | 0.650                           | -0.250                          | 0.670                           |
|                                                                | O <sub>T</sub> -C <sub>G</sub> -C <sub>G</sub> -H <sub>G</sub> | 0.000                           | 0.000                           | 0.468                           |
|                                                                | O <sub>T</sub> -C <sub>G</sub> -C <sub>G</sub> -O <sub>S</sub> | 1.740                           | -0.157                          | 0.279                           |
|                                                                | H <sub>G</sub> -C <sub>G</sub> -C <sub>G</sub> -H <sub>G</sub> | 0.000                           | 0.000                           | 0.318                           |
|                                                                | H <sub>G</sub> -C <sub>G</sub> -C <sub>G</sub> -O <sub>S</sub> | 0.000                           | 0.000                           | 0.468                           |
|                                                                | C <sub>G</sub> -C <sub>G</sub> -O <sub>S</sub> -C <sub>S</sub> | 0.650                           | -0.250                          | 0.670                           |
|                                                                | C <sub>G</sub> -O <sub>S</sub> -C <sub>S</sub> -C <sub>S</sub> | 0.650                           | -0.250                          | 0.670                           |
|                                                                | C <sub>G</sub> -O <sub>S</sub> -C <sub>S</sub> -H <sub>G</sub> | 0.000                           | 0.000                           | 0.760                           |
|                                                                | H <sub>G</sub> -C <sub>G</sub> -O <sub>S</sub> -C <sub>S</sub> | 0.000                           | 0.000                           | 0.760                           |
|                                                                | O <sub>S</sub> -C <sub>S</sub> -C <sub>S</sub> -H <sub>G</sub> | 0.000                           | 0.000                           | 0.468                           |
|                                                                | O <sub>S</sub> -C <sub>S</sub> -C <sub>S</sub> -O <sub>S</sub> | 1.740                           | -0.157                          | 0.279                           |
| H <sub>G</sub> -C <sub>S</sub> -C <sub>S</sub> -H <sub>G</sub> | 0.000                                                          | 0.000                           | 0.318                           |                                 |
| H <sub>G</sub> -C <sub>S</sub> -C <sub>S</sub> -O <sub>S</sub> | 0.000                                                          | 0.000                           | 0.468                           |                                 |

**Table S3.** Experimentally obtained parameters for the calculation of Onsager transport coefficients. [Li(G3)][TFSA] was obtained from ref. 20 and  $\sigma_{ion}$ ,  $D_{Li}$ , and  $D_{anion}$  of [Li(G4)][BF<sub>4</sub>] and [Li(G3)][TFA] were obtained from ref. 21.

| Sample                     | $\sigma_{ion}$<br>[mS cm <sup>-1</sup> ] | $t_{Li}^{PP}$ | $D_{Li}$<br>[10 <sup>-7</sup> cm <sup>2</sup> s <sup>-1</sup> ] | $D_{anion}$<br>[10 <sup>-7</sup> cm <sup>2</sup> s <sup>-1</sup> ] | $D_{salt}$<br>[10 <sup>-7</sup> cm <sup>2</sup> s <sup>-1</sup> ] | $\frac{d\Delta\varphi}{d\ln(c)}$ |
|----------------------------|------------------------------------------|---------------|-----------------------------------------------------------------|--------------------------------------------------------------------|-------------------------------------------------------------------|----------------------------------|
| [Li(G3)][TFSA]             | 1.1                                      | 0.028         | 0.77                                                            | 0.54                                                               | 0.53                                                              | 0.78                             |
| [Li(G3)][TfO]              | 0.30                                     | 0.44          | 0.42                                                            | 0.33                                                               | 1.6                                                               | 0.20                             |
| [Li(G3)][TFA]              | 0.096                                    | 0.90          | 0.87                                                            | 0.73                                                               | 3.6                                                               | 0.06                             |
| [Li(G4)][BF <sub>4</sub> ] | 0.50                                     | 0.30          | 0.44                                                            | 0.43                                                               | 0.69                                                              | 0.16                             |

**Table S4.** Normalized transport coefficients of all the electrolytes at 30 °C. Data for [Li(G3)][TFSA] were obtained from ref. 20.

| Sample                     | $\sigma_{+}^{self}/\sigma_{ion}$ | $\sigma_{-}^{self}/\sigma_{ion}$ | $\sigma_{++}^{distinct}/\sigma_{ion}$ | $\sigma_{--}^{distinct}/\sigma_{ion}$ | $\sigma_{+-}/\sigma_{ion}$ |
|----------------------------|----------------------------------|----------------------------------|---------------------------------------|---------------------------------------|----------------------------|
| [Li(G3)][TFSA]             | 0.79                             | 0.56                             | -0.65                                 | -0.45                                 | -0.21                      |
| [Li(G3)][TfO]              | 2.02                             | 1.59                             | -1.37                                 | -0.14                                 | 0.55                       |
| [Li(G3)][TFA]              | 13.47                            | 11.30                            | 53.70                                 | 60.30                                 | 68.89                      |
| [Li(G4)][BF <sub>4</sub> ] | 1.26                             | 1.23                             | -0.94                                 | -0.41                                 | 0.06                       |

**Table S5.** The possible Li–Li coordination distances between labelled each Li atom obtained from the crystal structure of Li[TFA] and G4 mixture. (Crystal structure and labelled Li atoms were shown in **Figure S8**).

| Possible Li–Li coordination |   | Distance [ $\text{\AA}$ ] |
|-----------------------------|---|---------------------------|
| 1                           | 2 | 3.139                     |
| 1                           | 3 | 5.007                     |
| 1                           | 4 | 8.438                     |
| 1                           | 5 | 9.998                     |
| 1                           | 6 | 15.684                    |
| 2                           | 3 | 3.857                     |
| 2                           | 4 | 7.504                     |
| 2                           | 5 | 8.321                     |
| 2                           | 6 | 13.912                    |
| 3                           | 4 | 3.876                     |
| 3                           | 5 | 4.994                     |
| 3                           | 6 | 10.678                    |
| 4                           | 5 | 3.162                     |
| 4                           | 6 | 7.954                     |
| 5                           | 6 | 5.69                      |

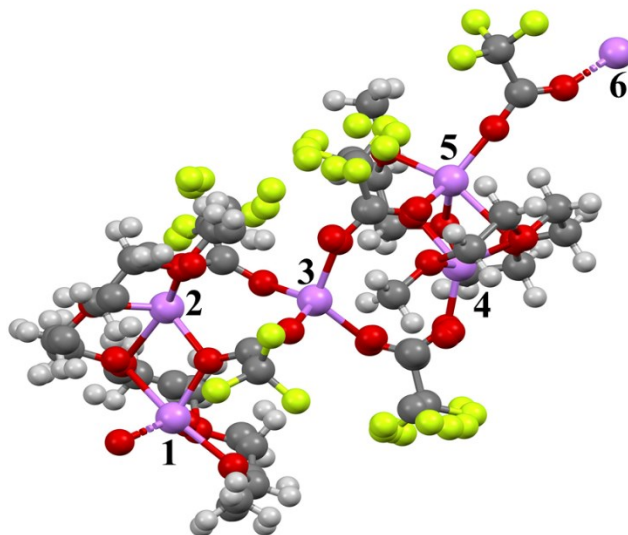

**Figure S8.** Crystal structure of Li[TFA] and G4 mixture and labelled Li atoms (Purple). The structure was obtained from ref. 60.
